# Supplementary material for: Morphological and swelling behavior of cellulose nanofiber (CNF)/poly(vinyl alcohol) (PVA) hydrogels: poly(ethylene glycol) (PEG) as porogen
Source: Royal Society of Chemistry journal article supplement (doi:10.1039/c6ra03620a), 2016-01-01
Supplement: c6ra03620a1.pdf [file c6ra03620a1.pdf]

Supplementary data for

**Morphological and swelling behavior of cellulose nanofiber (CNF)/Poly (vinyl alcohol) (PVA) hydrogels: Poly (ethylene glycol) (PEG) as porogen**

Zhaoyang Xu \*, Jianyu Li, Huan Zhou, Xiangdong Jiang, Chuang Yang, Fei Wang,

Yuanyuan Pan, Nana Li, Xiaoyan Li, Lina Shi, Xiaomei Shi

College of Materials Science & Engineering, Nanjing Forestry University, Nanjing,

Jiangsu 210037, China

**Figures**

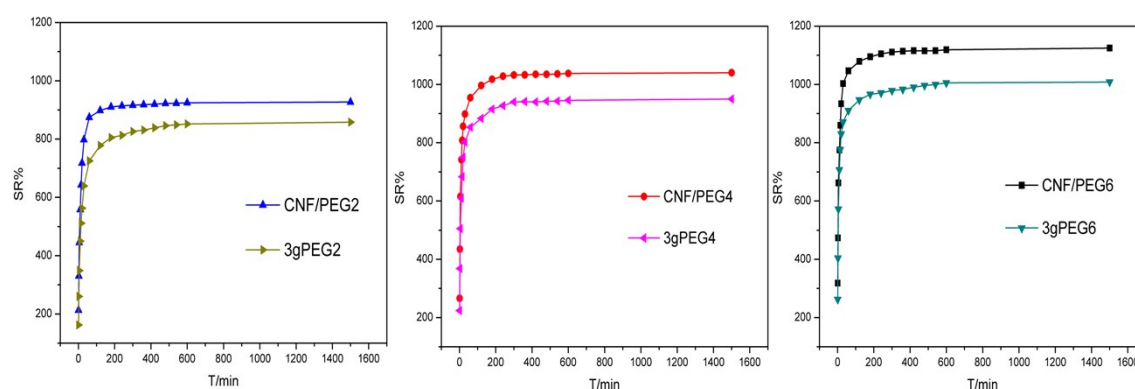

Fig. S1. Swelling properties of hydrogels with different formulations.

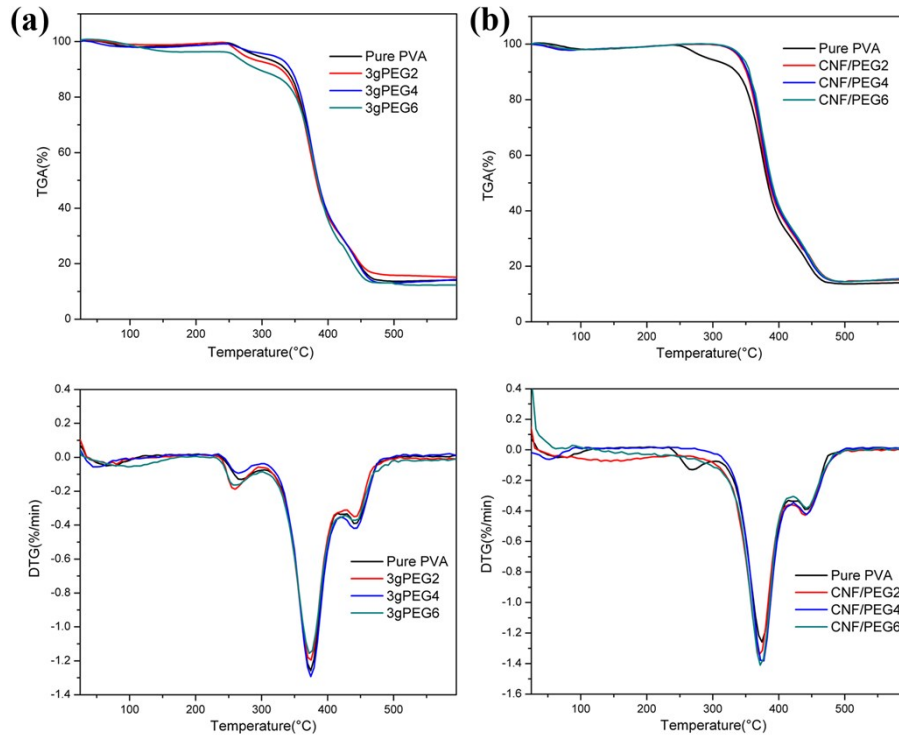

Fig. S2. TGA and DTG curves of PVA based hydrogels with different formulations of PEG and CNF.
